# Supplementary material
Source: PubMed Central journal article supplement (PMC4315656)

## Intrinsic site-selectivity of ubiquitin dimer formation

Kristen A. Andersen, Langdon J. Martin, Joel M. Prince, and Ronald T. Raines\*

| <b>Table S1.</b> Values of $k$ ( $M^{-1}s^{-1}$ ) for the reaction of Ubiquitin <sup>K→C(NTB)</sup> and Ubiquitin <sup>C77</sup> or AlaAlaCys |                                       |                        |
|-----------------------------------------------------------------------------------------------------------------------------------------------|---------------------------------------|------------------------|
| Ubiquitin <sup>K→C(NTB)</sup>                                                                                                                 | Ubiquitin <sup>C77</sup> <sup>a</sup> | AlaAlaCys <sup>b</sup> |
| K6C                                                                                                                                           | 17 ± 1                                | 15 ± 2                 |
| K11C                                                                                                                                          | 90 ± 9                                | 56 ± 4                 |
| K27C                                                                                                                                          | 3 ± 2                                 | 2.4 ± 0.6              |
| K29C                                                                                                                                          | 6.9 ± 0.9                             | 4.5 ± 1.0              |
| K33C                                                                                                                                          | 10.0 ± 0.3                            | 2.4 ± 0.6              |
| K48C                                                                                                                                          | 58 ± 5                                | 16 ± 2                 |
| K63C                                                                                                                                          | 182 ± 20                              | 122 ± 4                |

<sup>a</sup>From data in Figure 2A and eq 3.  
<sup>b</sup>From data in Figure S1 and eq 3.

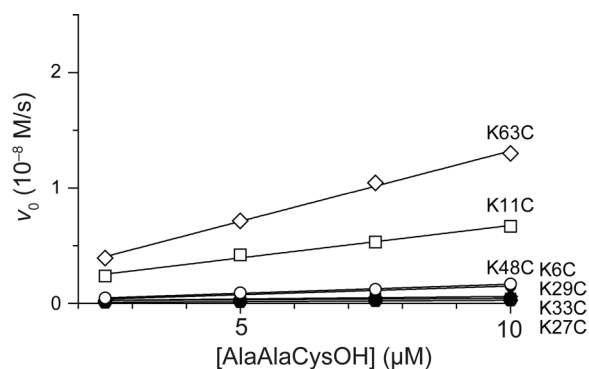

**Figure S1.** Graph of the rates of formation of ubiquitin dimers between AlaAlaCys (10  $\mu$ M) and varying concentrations of a Ubiquitin<sup>K→C(NTB)</sup> variant (0–10  $\mu$ M). Data are for the release of 5-thio-2-nitrobenzoate during a reaction analogous to that shown in Figure 1B.

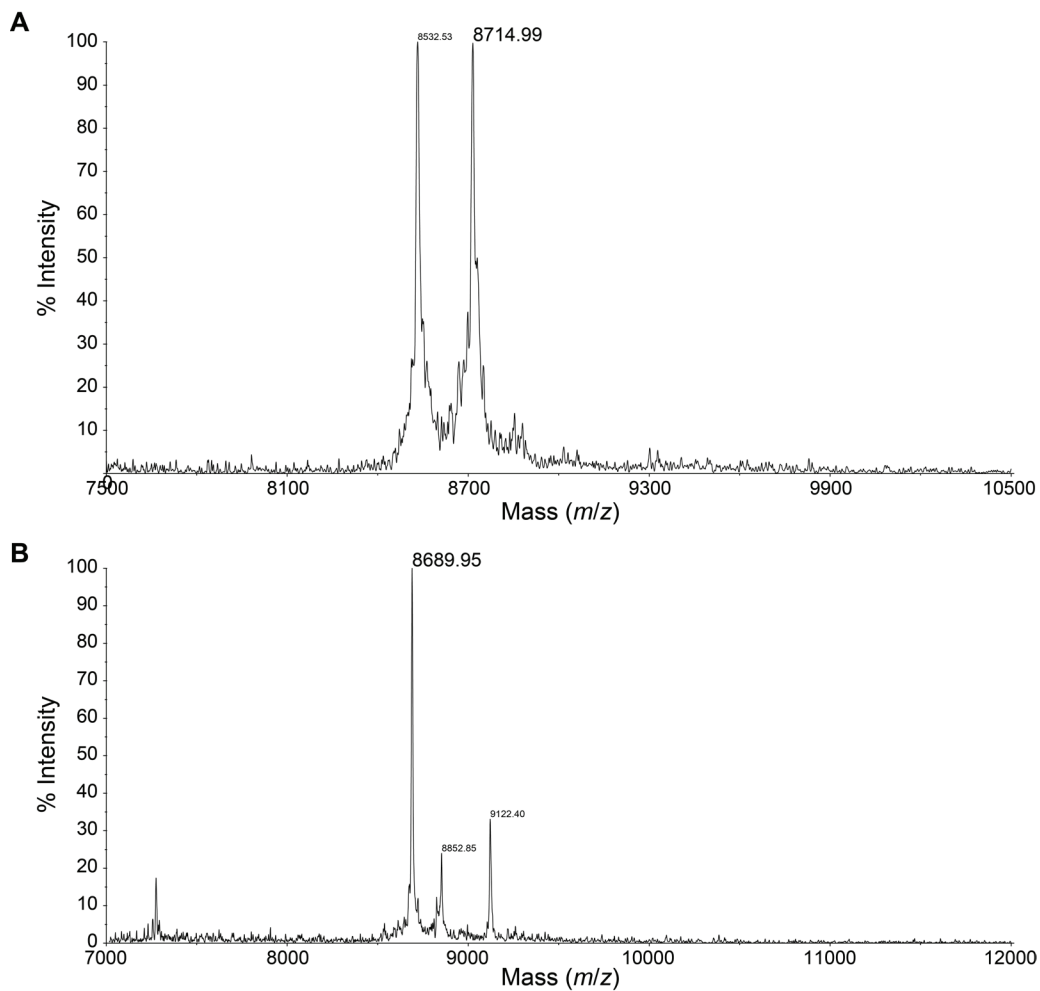

**Figure S2.** Characterization of monomeric ubiquitin variants by MALDI-TOF mass spectrometry. (A) A Ubiquitin<sup>K→C(NTB)</sup> variant, K48C ubiquitin treated with DTNB (expected  $m/z$  8715). The disulfide bond is labile to cleavage during analysis by MALDI-TOF mass spectrometry. (B) Ubiquitin<sup>77C</sup> (expected  $m/z$  8687).

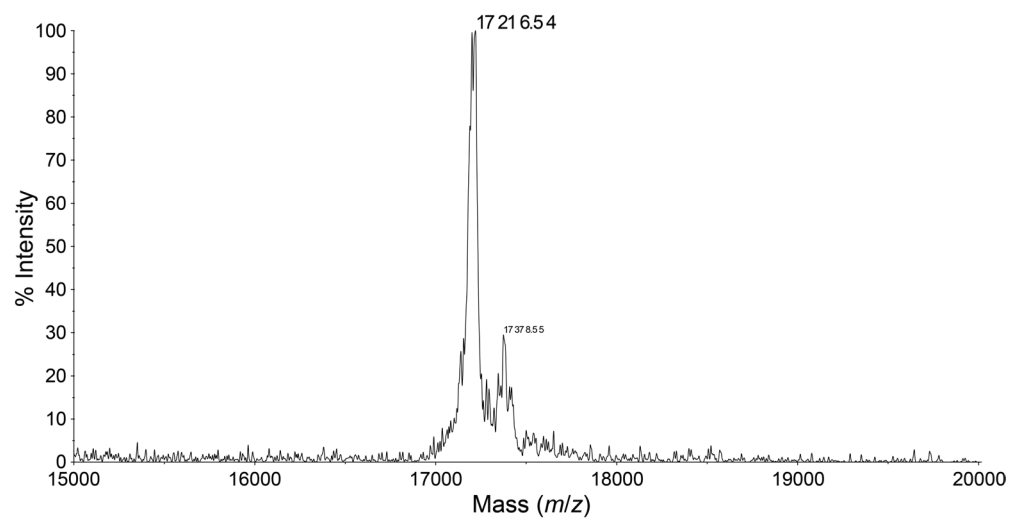

**Figure S3.** Characterization of a ubiquitin dimer by MALDI-TOF mass spectrometry, Ubiquitin<sup>77C</sup>-Ubiquitin<sup>K48C</sup> (expected  $m/z$  17217).

$^1\text{H}$  NMR Spectrum (Methanol- $d_4$ ) of AlaAlaCys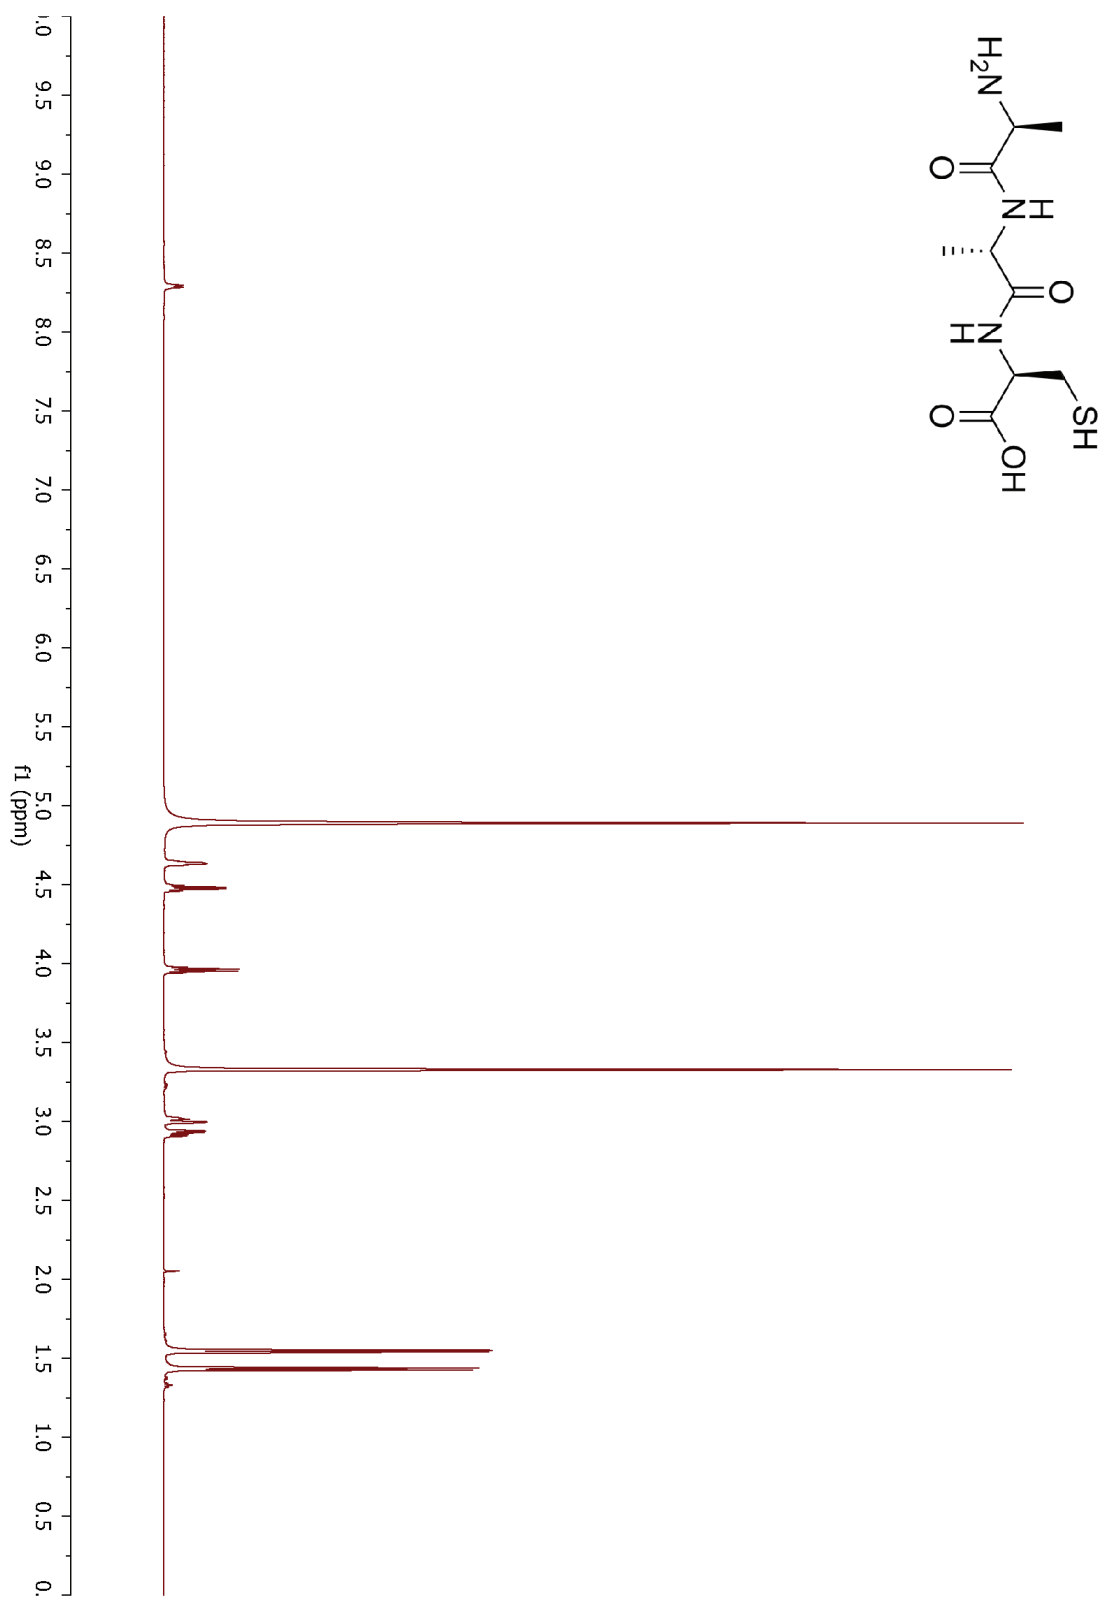

$^{13}\text{C}$  NMR Spectrum (Methanol- $d_4$ ) of AlaAlaCys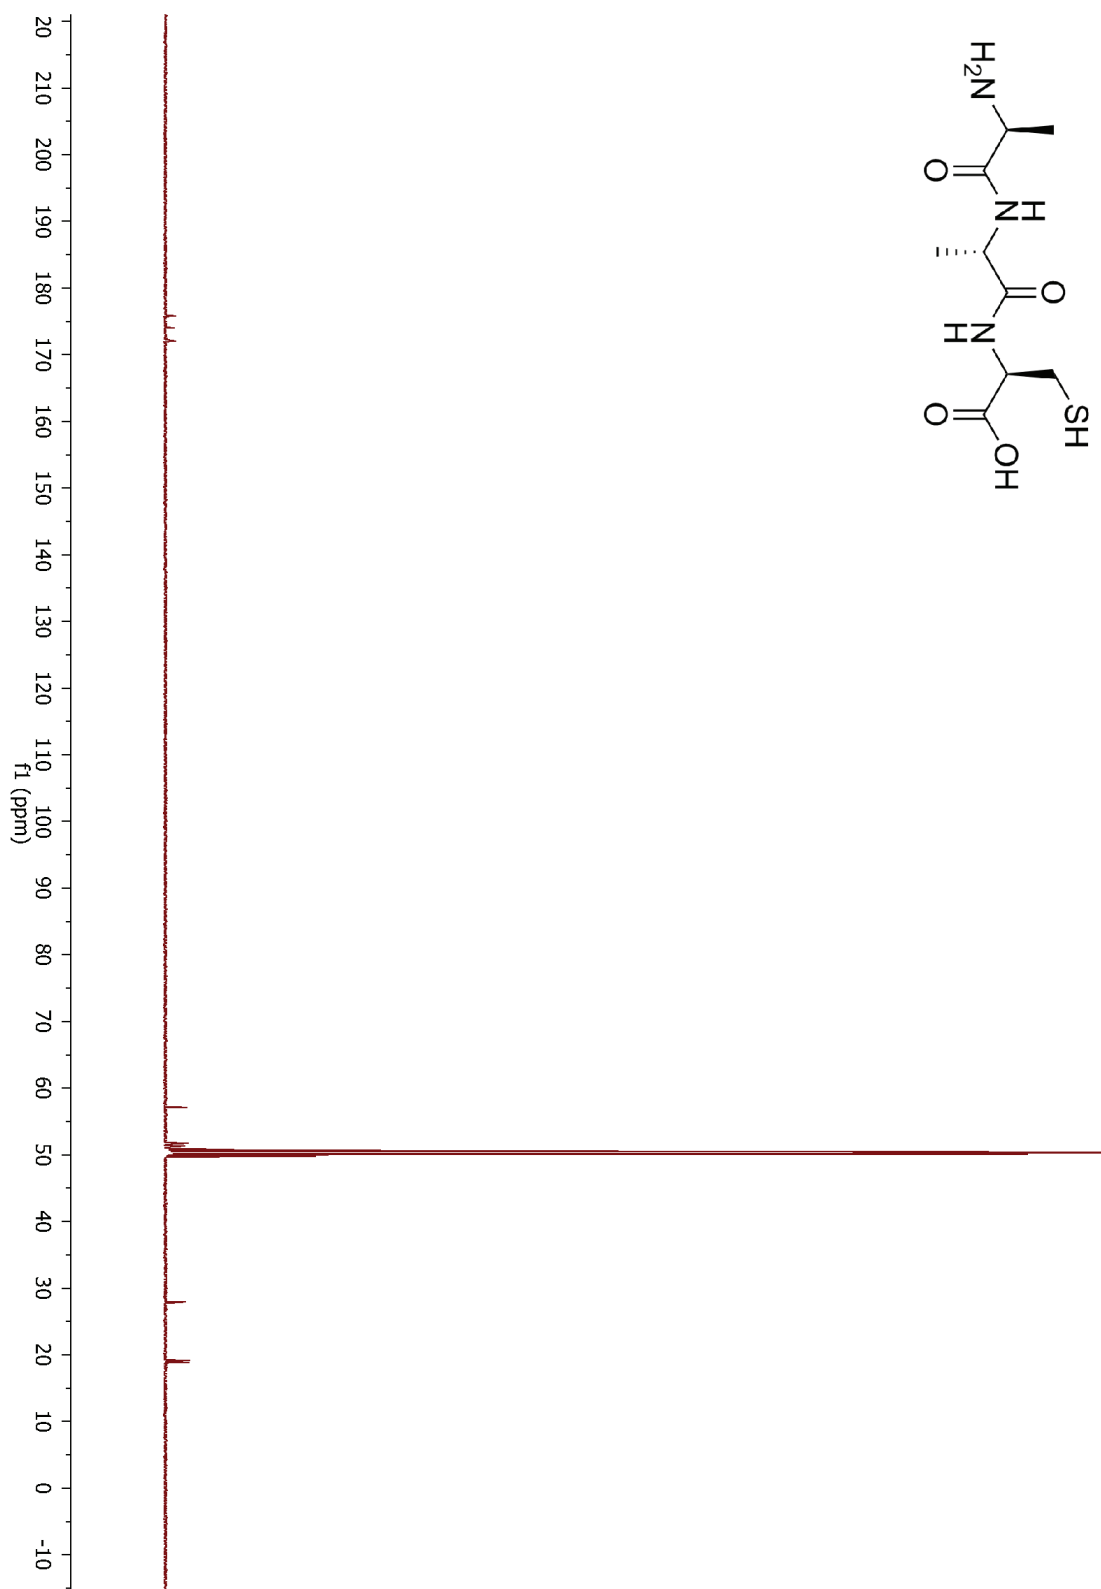

Supplement: pro0024-0182-sd1.pdf [file pro0024-0182-sd1.pdf]
